# Supplementary material for: Evaluation of Virtual Screening Strategies for the Identification of γ-Secretase Inhibitors and Modulators
Source: MDPI journal article supplement (doi:10.3390/molecules27010176), 2021-12-28
Supplement: s1 [file s1]

# Evaluation of Virtual Screening Strategies for the Identification of $\gamma$ -Secretase Inhibitors and Modulators

Alicia Ioppolo <sup>1</sup>, Melissa Eccles <sup>1</sup>, David Groth <sup>1</sup>, Giuseppe Verdile <sup>2</sup>, Mark Agostino <sup>1,3,\*</sup>

<sup>1</sup> Curtin Health and Innovation Research Institute, Curtin Medical School, Curtin University, Bentley WA 6102, Australia; alicia.ioppolo@postgrad.curtin.edu.au (A.I.); melissa.eccles@postgrad.curtin.edu.au (M.E.); D.Groth@curtin.edu.au (D.G.)

<sup>2</sup> School of Medical and Health Sciences, Edith Cowan University, Joondalup, WA 6027, Australia; giuseppe.verdile@curtin.edu.au

<sup>3</sup> Curtin Institute for Computation, Curtin University, Bentley WA 6102, Australia

\* Correspondence: mark.agostino@curtin.edu.au

**Table S1.** Evaluation of Glide HTVS docking for reproducing bound structures of  $\gamma$ -secretase inhibitors and modulators.<sup>a</sup>

|      | E2012         | Avagacestat    | Semagacestat | L685,458                  | Means    |
|------|---------------|----------------|--------------|---------------------------|----------|
| 6IYC | 10.4, 3.6 (4) | 9.4, 9.4 (1)   | 5.2, 3.9 (6) | 2.9, 2.9 (1) <sup>b</sup> | 7.0, 5.0 |
| 6IDF | 9.9, 6.5 (3)  | 6.1, 5.8 (2)   | 5.0, 4.7 (5) | - <sup>c</sup>            | 7.0, 5.7 |
| 6LQG | 10.6, 5.3 (4) | 6.8, 5.2 (2)   | 5.1, 5.1 (1) | - <sup>c</sup>            | 7.5, 5.2 |
| 6LR4 | 8.0, 8.0 (1)  | - <sup>c</sup> | 0.6, 0.6 (1) | - <sup>c</sup>            | 4.3, 4.3 |
| 7C9I | 10.3, 3.5 (5) | - <sup>c</sup> | 6.3, 6.3 (1) | - <sup>c</sup>            | 8.3, 4.9 |
| 7D8X | 3.5, 3.5 (1)  | 9.6, 9.6 (1)   | 7.8, 7.8 (1) | - <sup>c</sup>            | 7.0, 7.0 |

<sup>a</sup>Values reported are RMSD of top-ranked pose, RMSD of best fitting pose and rank of the best fitting pose (in parentheses). All values reported in angstroms. <sup>b</sup>RMSD computed against L685,458 in PDB 7D8X. <sup>c</sup>No poses obtained for this ligand against this model.

**Table S2.** Evaluation of Glide SP docking for reproducing bound structures of  $\gamma$ -secretase inhibitors and modulators.<sup>a</sup>

| PDB ID | E2012          | Avagacestat  | Semagacestat | L685,458                   | Mean values |
|--------|----------------|--------------|--------------|----------------------------|-------------|
| 6IYC   | 10.4, 2.2 (21) | 2.1, 2.1 (1) | 1.4, 1.2 (2) | 8.9, 2.3 (12) <sup>b</sup> | 5.7, 2.0    |
| 6IDF   | 9.4, 5.5 (35)  | 1.9, 1.9 (1) | 1.0, 1.0 (1) | 8.1, 6.7 (6) <sup>b</sup>  | 5.1, 3.8    |
| 6LQG   | 7.8, 2.5 (38)  | 1.9, 1.9 (1) | 1.9, 1.9 (1) | 5.0, 5.0 (1) <sup>b</sup>  | 4.2, 2.8    |
| 6LR4   | 9.9, 3.6 (41)  | 7.3, 7.3 (1) | 1.0, 0.8 (3) | 8.7, 7.1 (2) <sup>b</sup>  | 6.7, 4.7    |
| 7C9I   | 10.2, 2.7 (23) | 2.8, 2.8 (1) | 1.5, 1.5 (1) | 11.2, 4.6 (6)              | 6.4, 2.9    |
| 7D8X   | 10.0, 2.0 (36) | 9.2, 2.6 (2) | 1.3, 1.3 (1) | 4.0, 4.0 (1)               | 6.1, 2.5    |

<sup>a</sup>Values reported are RMSD of top-ranked pose, RMSD of best fitting pose and rank of the best fitting pose (in parentheses). All values reported in angstroms. <sup>b</sup>RMSD computed against L685,458 in PDB 7D8X.

**Table S3.** Evaluation of ePharmacophores for reproducing bound structures of  $\gamma$ -secretase inhibitors and modulators.<sup>a</sup>

|      | E2012           | Avagacestat   | Semagacestat | L685,458                   | Means    |
|------|-----------------|---------------|--------------|----------------------------|----------|
| 6IYC | 9.5, 8.9 (5)    | 7.5, 7.5 (2)  | 8.6, 8.6 (1) | 10.1, 4.1 (6) <sup>b</sup> | 8.9, 7.3 |
| 6IDF | - <sup>c</sup>  | 8.6, 3.3 (26) | 4.8, 4.8 (1) | 10.0, 8.4 (4) <sup>b</sup> | 7.8, 5.5 |
| 6LQG | - <sup>c</sup>  | 3.1, 2.9 (3)  | 3.8, 3.8 (1) | 10.7, 5.1 (2) <sup>b</sup> | 5.9, 3.9 |
| 6LR4 | 10.0, 9.3 (17)  | 5.6, 5.6 (2)  | 1.6, 1.6 (1) | - <sup>c</sup>             | 5.7, 5.5 |
| 7C9I | 10.6, 10.5 (21) | 8.1, 3.3 (23) | 1.5, 1.5 (1) | 9.8, 7.6 (3)               | 7.5, 5.7 |
| 7D8X | 1.9, 1.9 (1)    | 8.4, 8.2 (2)  | 1.7, 1.5 (2) | 5.1, 5.1 (1)               | 4.3, 4.2 |

<sup>a</sup>Values reported are RMSD of top-ranked pose, RMSD of best fitting pose and rank of the best fitting pose (in parentheses). All values reported in angstroms. <sup>b</sup>RMSD computed against L685,458 in PDB 7D8X. <sup>c</sup>No poses obtained for this ligand against this model.

**Table S4.** Shape similarity of molecules remaining after applying  $\gamma$ -secretase inhibitor screening strategy to ZINC15 Investigational set compared to co-complexed  $\gamma$ -secretase inhibitors.

| ZINC ID          | Generic name (if available) | Similarity to |              |              |
|------------------|-----------------------------|---------------|--------------|--------------|
|                  |                             | Avagacestat   | Semagacestat | L685,458     |
| ZINC000003919807 | AG7088                      | 0.118         | 0.187        | 0.095        |
| ZINC000085548251 | A-77003                     | 0.148         | 0.159        | 0.128        |
| ZINC000043202141 | Oprozomib                   | 0.165         | <b>0.410</b> | 0.150        |
| ZINC000068077856 | Foxy-5                      | 0.108         | <b>0.216</b> | 0.189        |
| ZINC000082138051 | PF-03715455                 | 0.100         | 0.059        | 0.130        |
| ZINC000169345692 | Peptide T                   | 0.090         | 0.047        | 0.049        |
| ZINC000095586643 | Crenigacestat               | 0.123         | <b>0.605</b> | 0.134        |
| ZINC000049694463 | Cefcanel daloxate           | 0.069         | 0.074        | 0.141        |
| ZINC000090636091 | -                           | 0.071         | 0.198        | 0.053        |
| ZINC000003935423 | Droxinavir                  | 0.135         | <b>0.302</b> | <b>0.216</b> |
| ZINC000027657184 | Modipafant                  | 0.072         | 0.123        | 0.100        |
| ZINC000003830407 | Cefazolin                   | 0.103         | 0.151        | 0.053        |
| ZINC000003917787 | -                           | 0.108         | 0.186        | 0.170        |
| ZINC000001541366 | Ticolubant                  | 0.078         | 0.037        | 0.051        |
| ZINC000002012859 | Halofenate                  | 0.047         | 0.145        | 0.111        |
| ZINC000005599165 | Doreptide                   | 0.088         | 0.186        | 0.062        |
| ZINC000200259560 | MK-0767                     | 0.009         | 0.028        | 0.094        |
| ZINC000003915259 | Telinavir                   | 0.132         | 0.180        | 0.168        |
| ZINC000206178236 | Navarixin                   | 0.085         | 0.117        | 0.050        |
| ZINC000118795962 | Itacitinib                  | 0.115         | 0.052        | 0.102        |
| ZINC000028257302 | -                           | 0.112         | 0.043        | 0.122        |
| ZINC000004392972 | CP-195543                   | 0.075         | 0.136        | 0.072        |
| ZINC000000600399 | Lixivaptan                  | 0.116         | 0.175        | 0.052        |
| ZINC000003807687 | JTP-4819                    | 0.124         | 0.145        | 0.067        |
| ZINC000003831243 | Oxacillin                   | <b>0.200</b>  | <b>0.264</b> | 0.077        |

**Table S5.** Shape similarity of molecules remaining after applying  $\gamma$ -secretase modulator screening strategy to ZINC15 Investigational set compared to E2012.

| ZINC ID          | Generic Name (If Available) | Similarity to E2012 |
|------------------|-----------------------------|---------------------|
| ZINC000117704832 | PF-04691502                 | 0.118               |
| ZINC000003919807 | AG7088                      | 0.104               |
| ZINC000034285235 | AMG-208                     | 0.176               |
| ZINC000067172224 | E2012                       | 0.317               |
| ZINC000000005014 | Ocinaplon                   | 0.244               |

**Table S6.** Structures of  $\gamma$ -secretase used in this study.

| PDB ID | Substrate | Inhibitor    | Modulator | Resolution (Å) |
|--------|-----------|--------------|-----------|----------------|
| 6IYC   | APP       | -            | -         | 2.6            |
| 6IDF   | Notch     | -            | -         | 2.7            |
| 6LQG   | -         | Avagacestat  | -         | 3.1            |
| 6LR4   | -         | Semagacestat | -         | 3.0            |
| 7C9I   | -         | L685,458     | -         | 3.1            |
| 7D8X   | -         | L685,458     | E2012     | 2.6            |

**Table S7.**  $\gamma$ -secretase residues defining the ligand binding sites.

| Inhibitor Site                 |                                | Modulator Site                 |           |
|--------------------------------|--------------------------------|--------------------------------|-----------|
| Presenilin N-terminal fragment | Presenilin C-terminal fragment | Presenilin N-terminal fragment | Nicastrin |
| Tyr77                          | Val379                         | Phe105                         | Ile242    |
| Leu85                          | Lys380                         | Tyr106                         | Asn243    |
| Ile143                         | Leu381                         | Phe177                         |           |
| Thr147                         | Gly382                         | Ile180                         |           |
| Leu150                         | Leu383                         | Val236                         |           |
| Tyr256                         | Gly384                         | Tyr240                         |           |
| Asp257                         | Asp385                         |                                |           |
| Val261                         | Phe388                         |                                |           |
| Leu268                         | Leu418                         |                                |           |
| Leu271                         | Thr421                         |                                |           |
| Val272                         | Leu422                         |                                |           |
| Gln276                         | Leu425                         |                                |           |
| Leu282                         | Lys430                         |                                |           |
| Leu286                         | Ala431                         |                                |           |
| Ile287                         | Leu432                         |                                |           |
|                                | Pro433                         |                                |           |
|                                | Ala434                         |                                |           |
|                                | Leu435                         |                                |           |

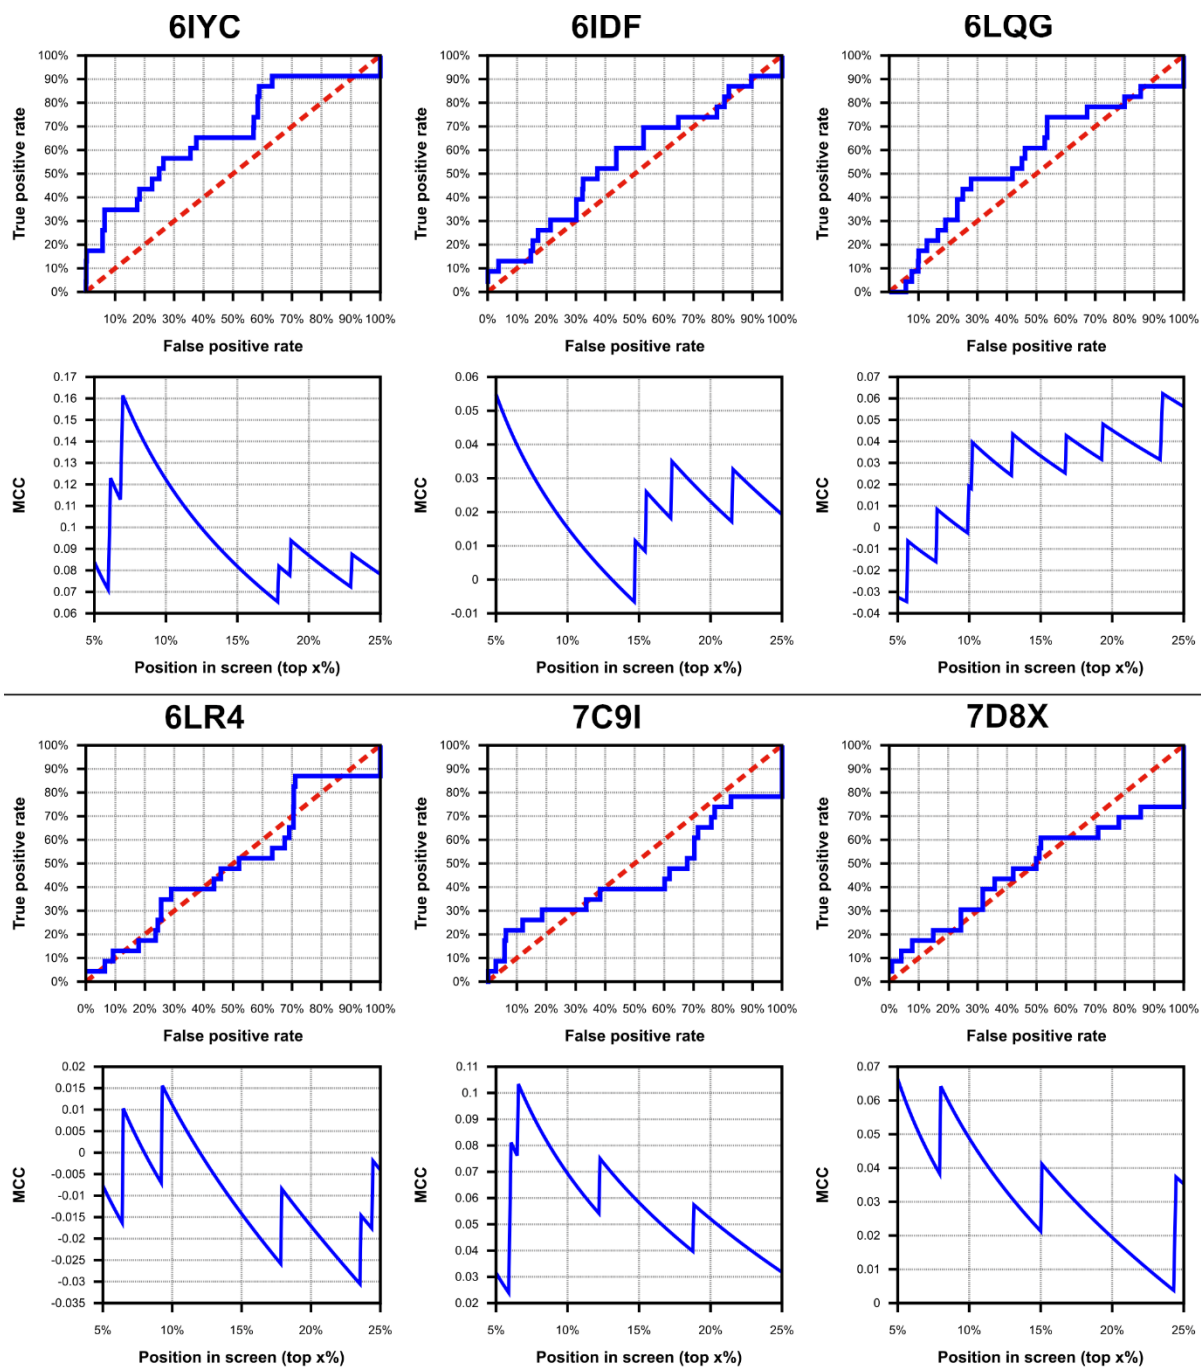

**Figure S1.** Receiver operating characteristic plots (first row; random performance indicated by red dashed line) and Matthew's correlation coefficients over the top 5–25% of screens (second row) for Glide HTVS screening of library of  $\gamma$ -secretase inhibitors and corresponding decoys from DUD-E.

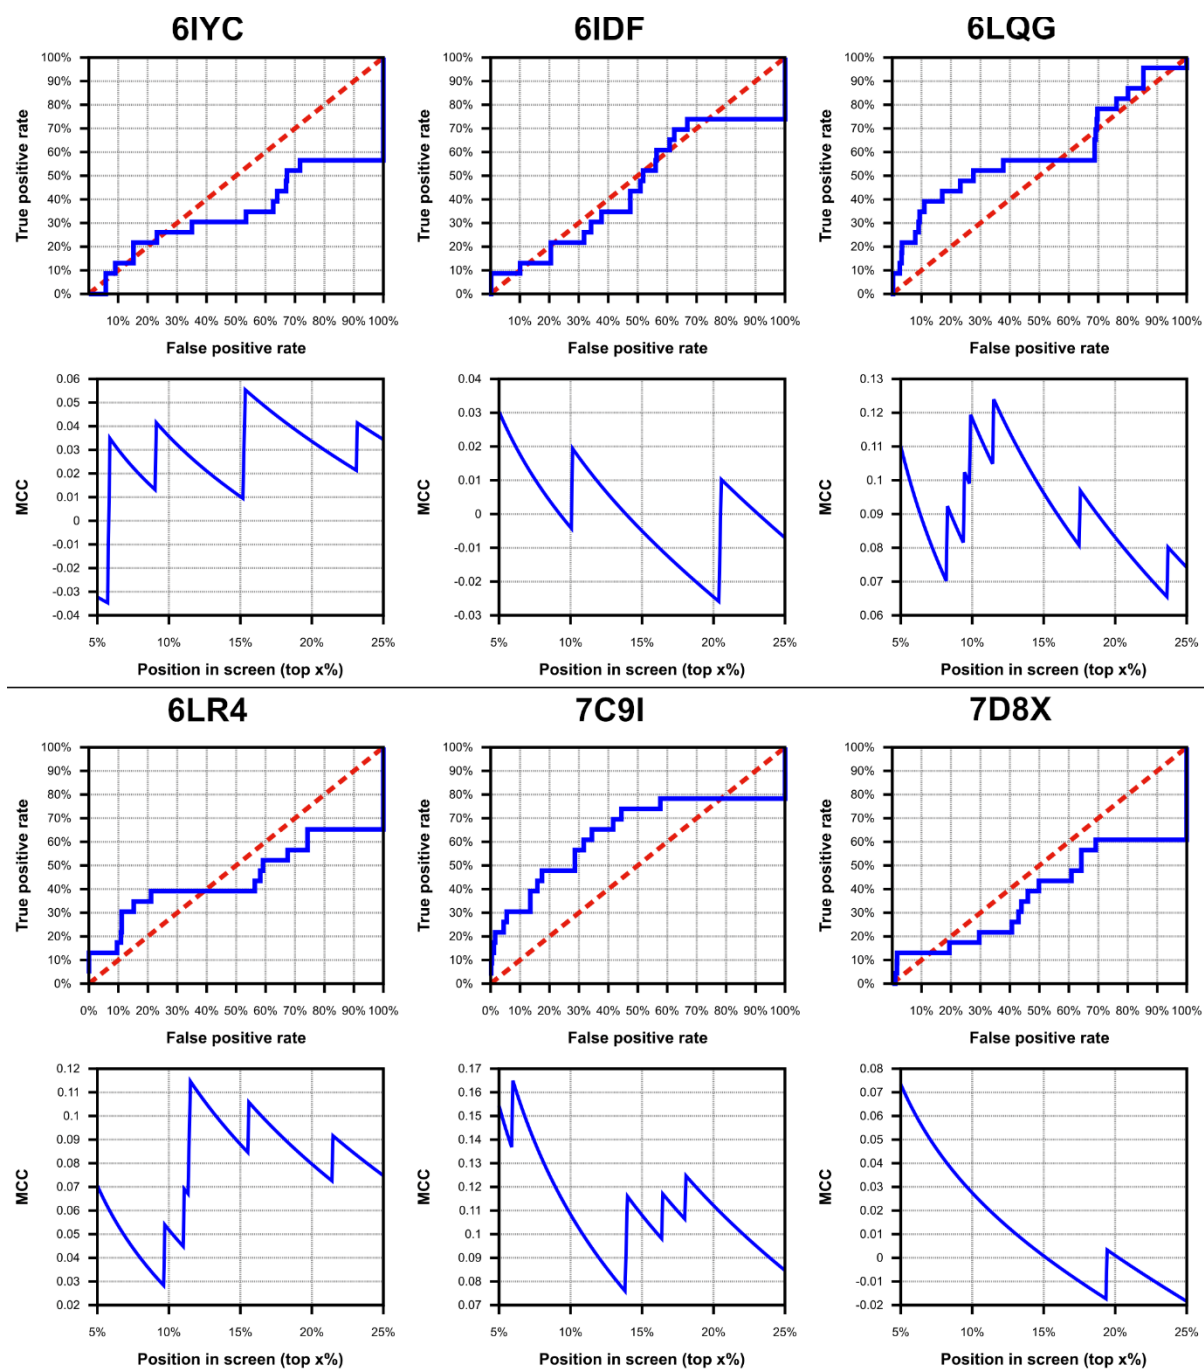

**Figure S2.** Receiver operating characteristic plots (first row; random performance indicated by red dashed line) and Matthew's correlation coefficients over the top 5-25% of screens (second row) for ePharmacophore-based screening of library of  $\gamma$ -secretase inhibitors and corresponding decoys from DUD-E.

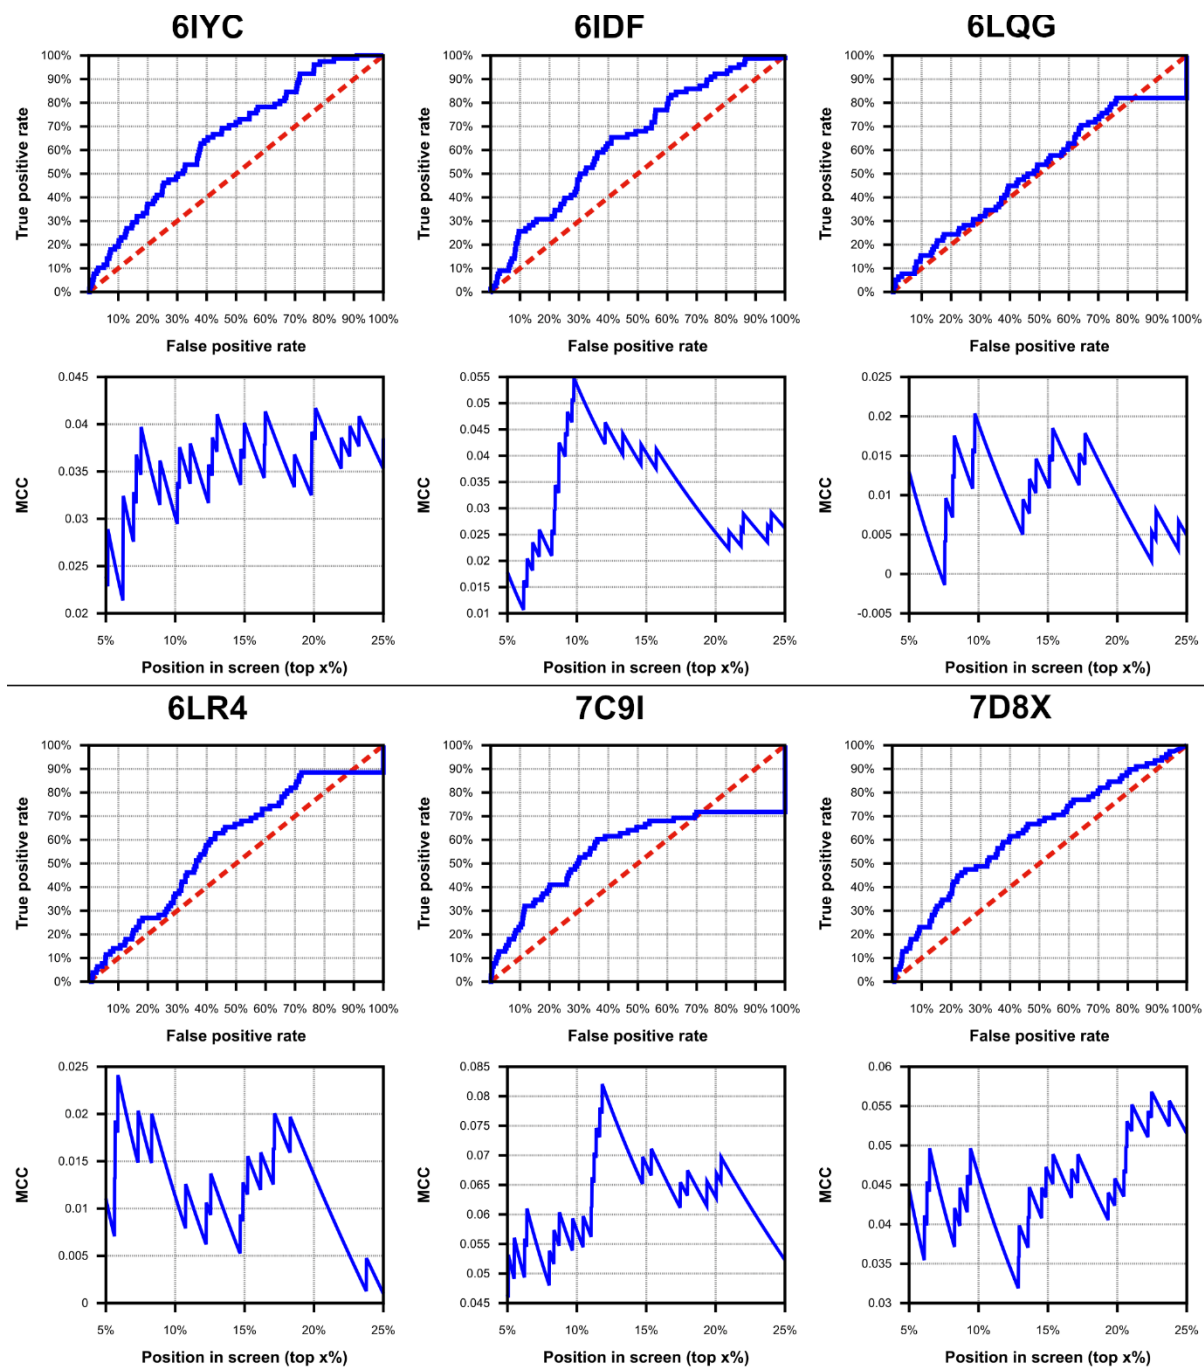

**Figure S3.** Receiver operating characteristic plots (first row; random performance indicated by red dashed line) and Matthew's correlation coefficients over the top 5–25% of screens (second row) for Glide HTVS screening of library of  $\gamma$ -secretase modulators and corresponding decoys from DUD-E.



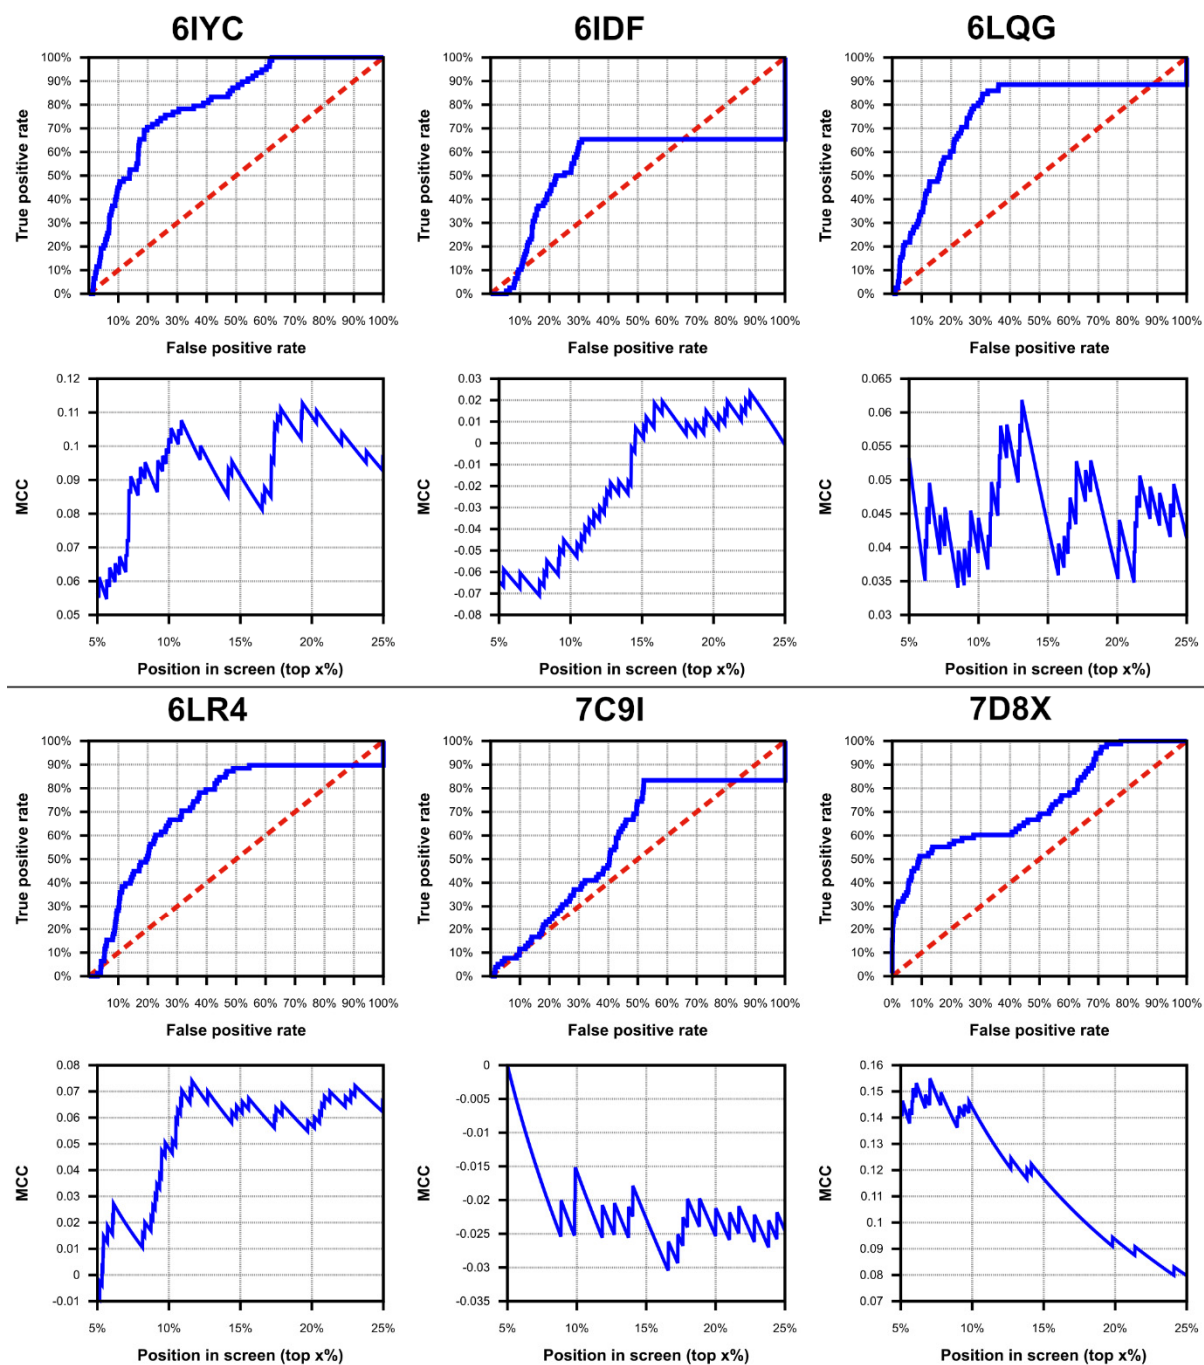

**Figure S4.** Receiver operating characteristic plots (first row; random performance indicated by red dashed line) and Matthew's correlation coefficients over the top 5-25% of screens (second row) for ePharmacophore-based screening of library of  $\gamma$ -secretase modulators and corresponding decoys from DUD-E.

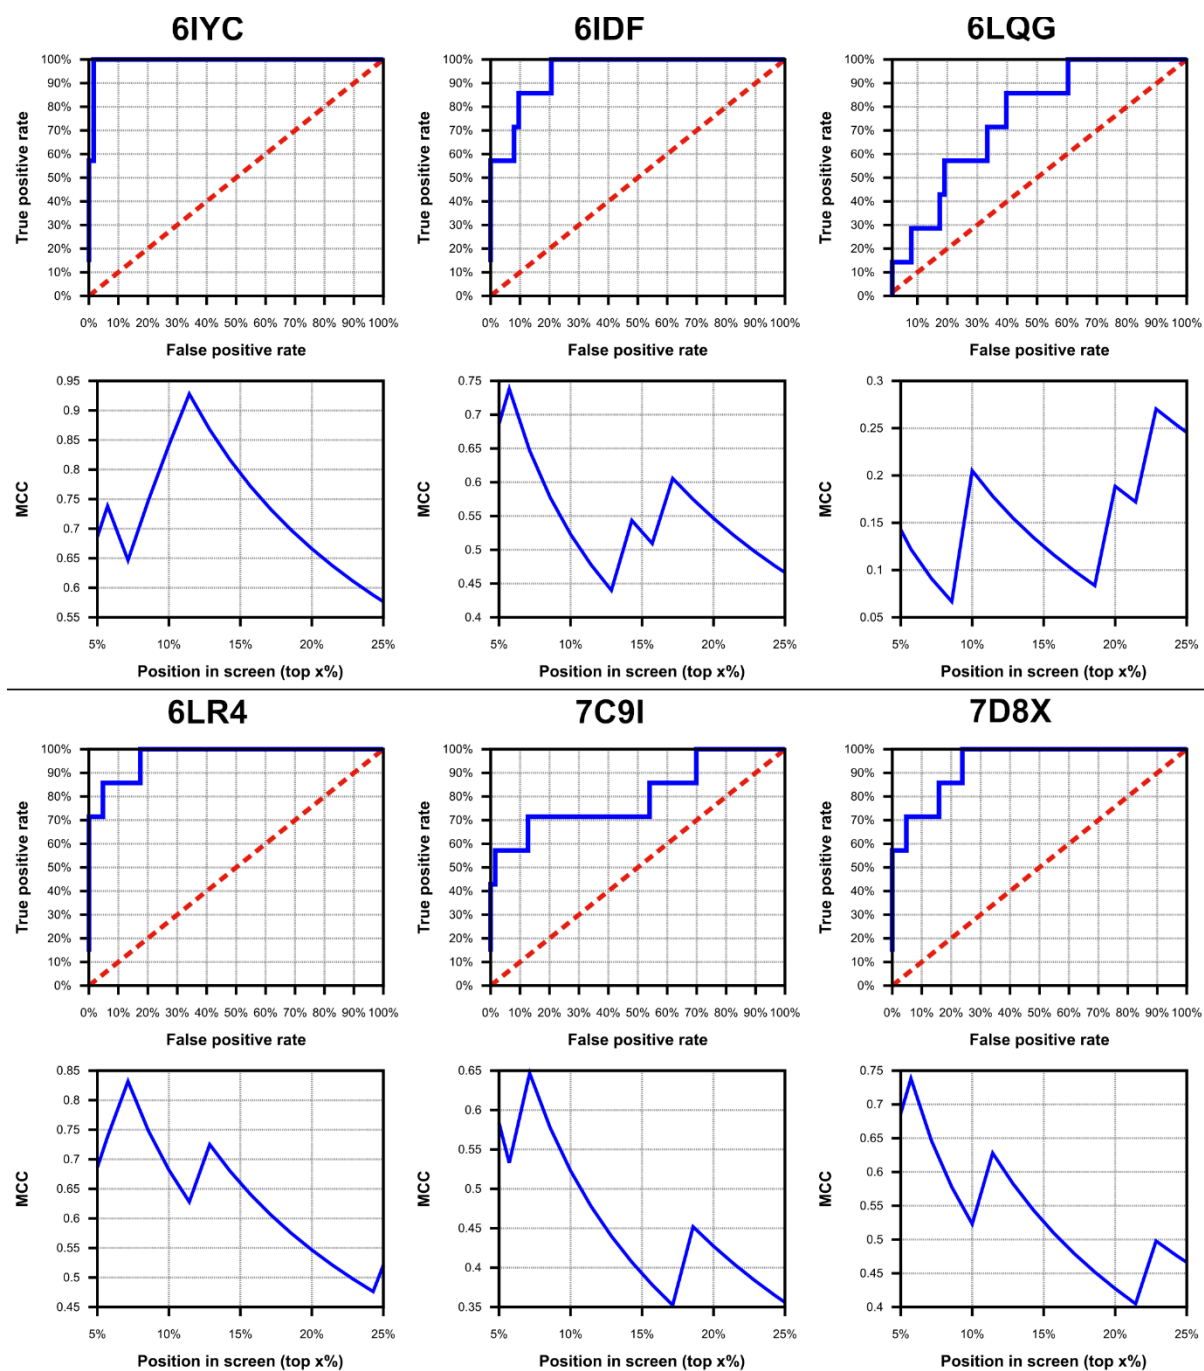

**Figure S5.** Receiver operating characteristic plots (first row; random performance indicated by red dashed line) and Matthew's correlation coefficients over the top 5-25% of screens (second row) for Glide SP (with flexible sampling) screening of top 6% of molecules obtained following ePharmacophore-based screening of library containing  $\gamma$ -secretase inhibitors and decoys from DUD-E.



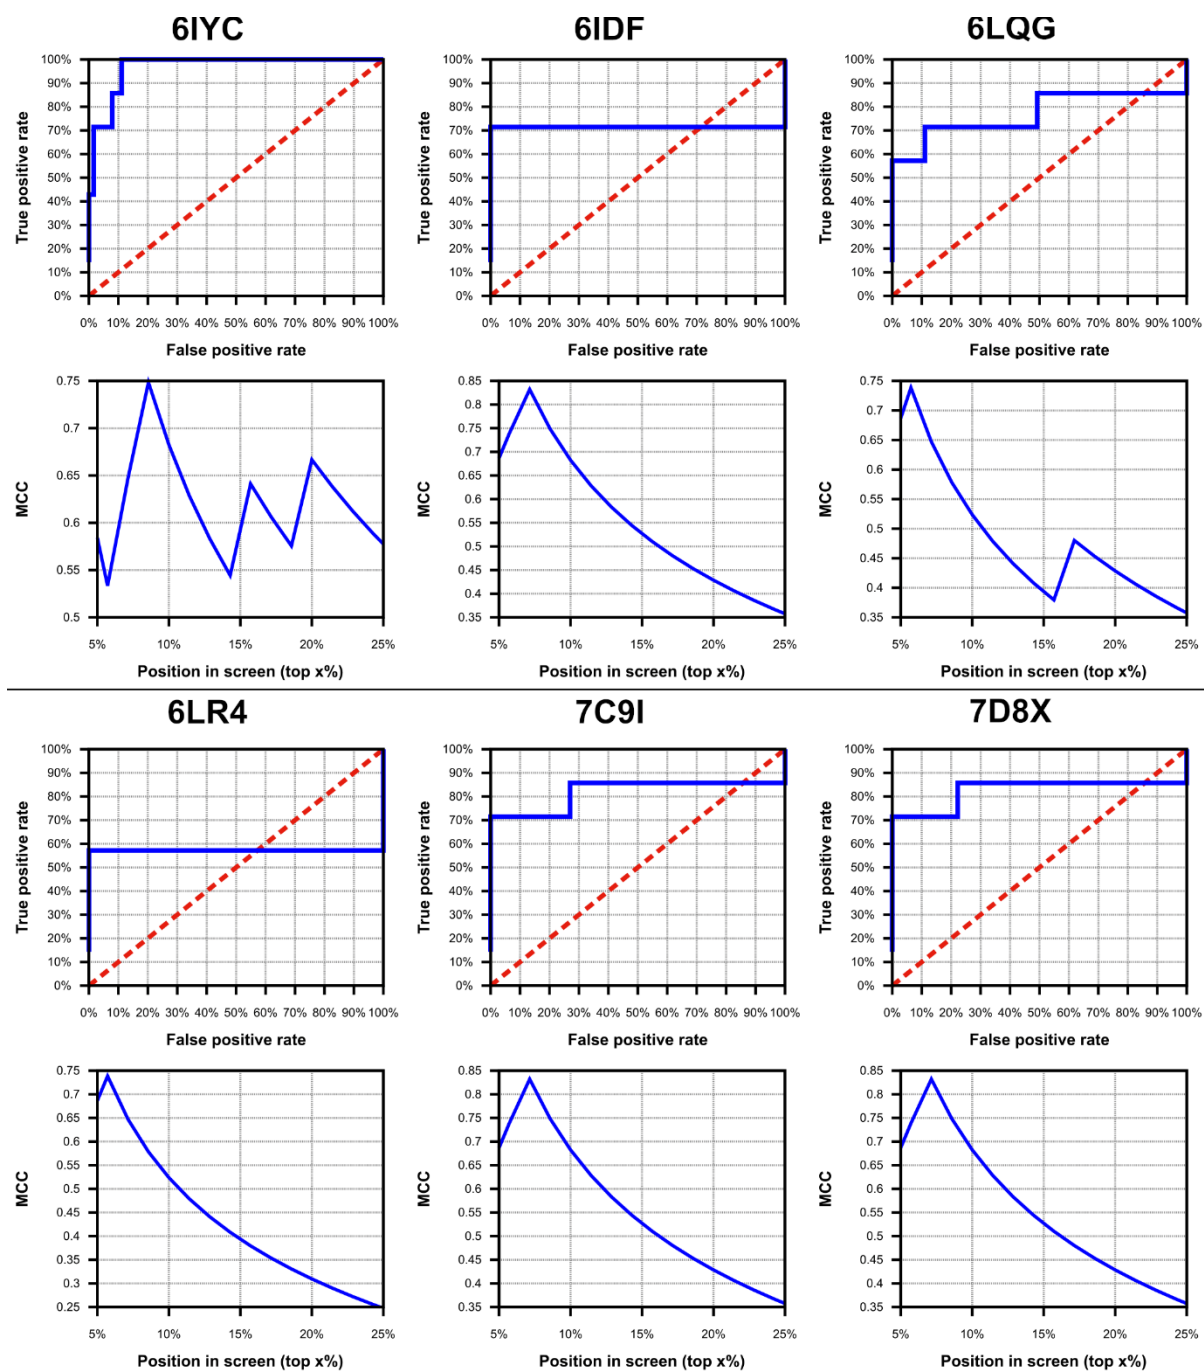

**Figure S6.** Receiver operating characteristic plots (first row; random performance indicated by red dashed line) and Matthew's correlation coefficients over the top 5-25% of screens (second row) for Glide SP (refine only) screening of top 6% of molecules obtained following ePharmacophore-based screening of library containing  $\gamma$ -secretase inhibitors and decoys from DUD-E.

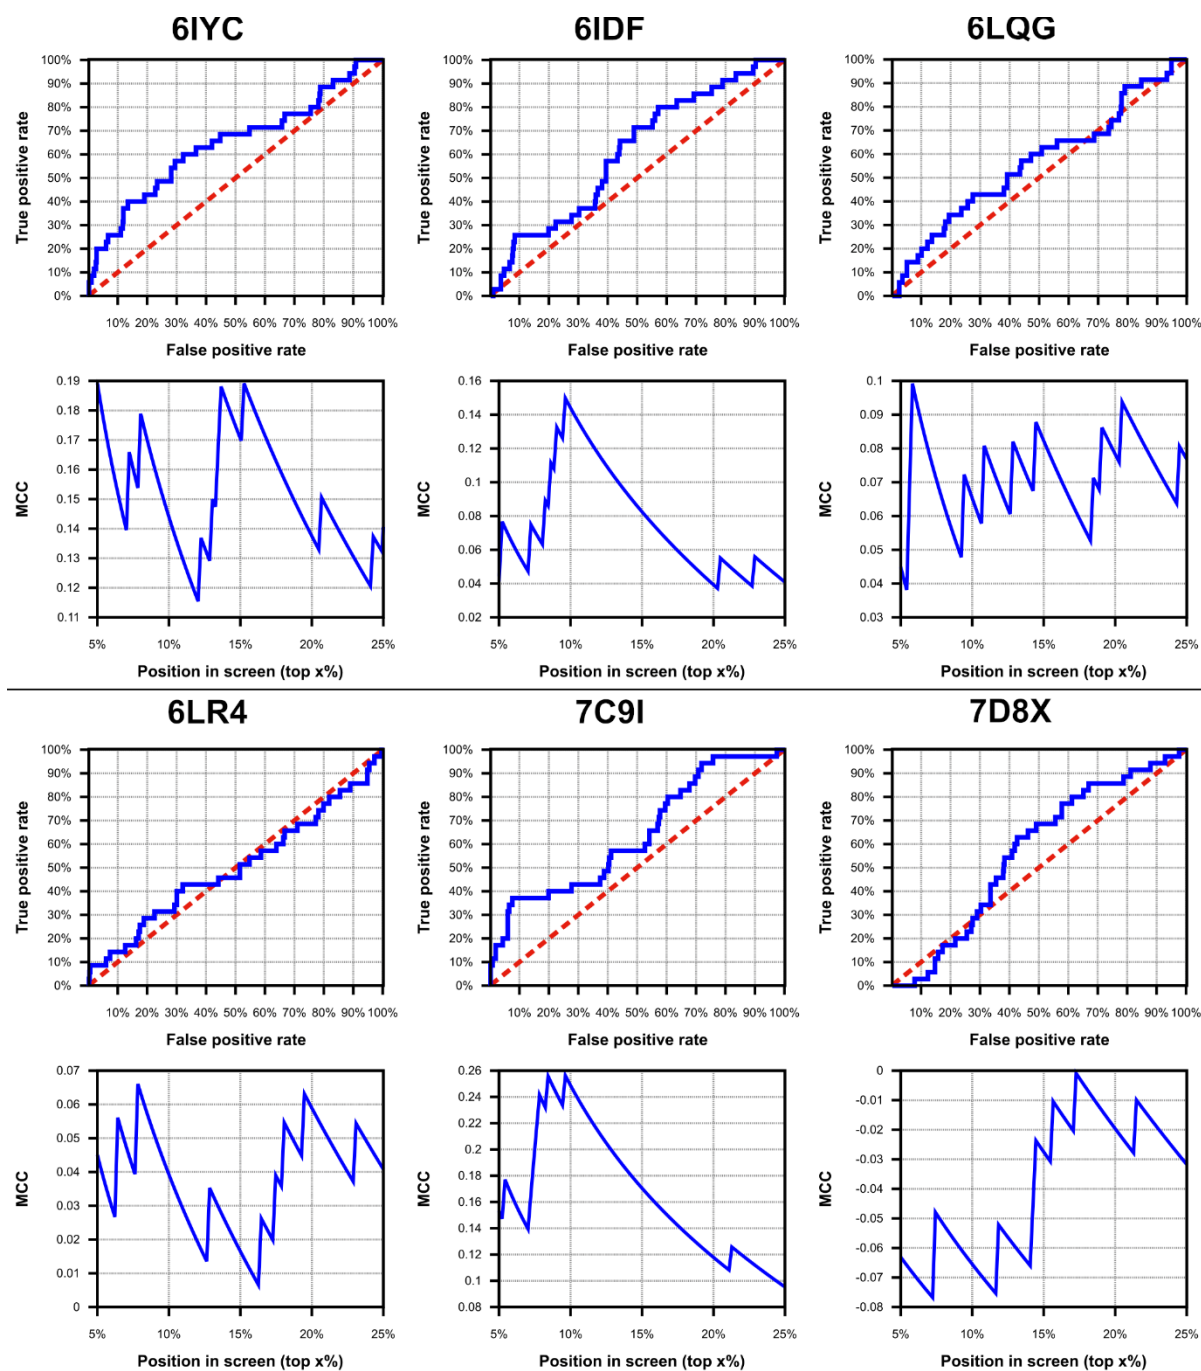

**Figure S7.** Receiver operating characteristic plots (first row; random performance indicated by red dashed line) and Matthew's correlation coefficients over the top 5-25% of screens (second row) for Glide SP (with flexible sampling) screening of top 7% of molecules obtained following ePharmacophore-based screening of library containing  $\gamma$ -secretase modulators and decoys from DUD-E.

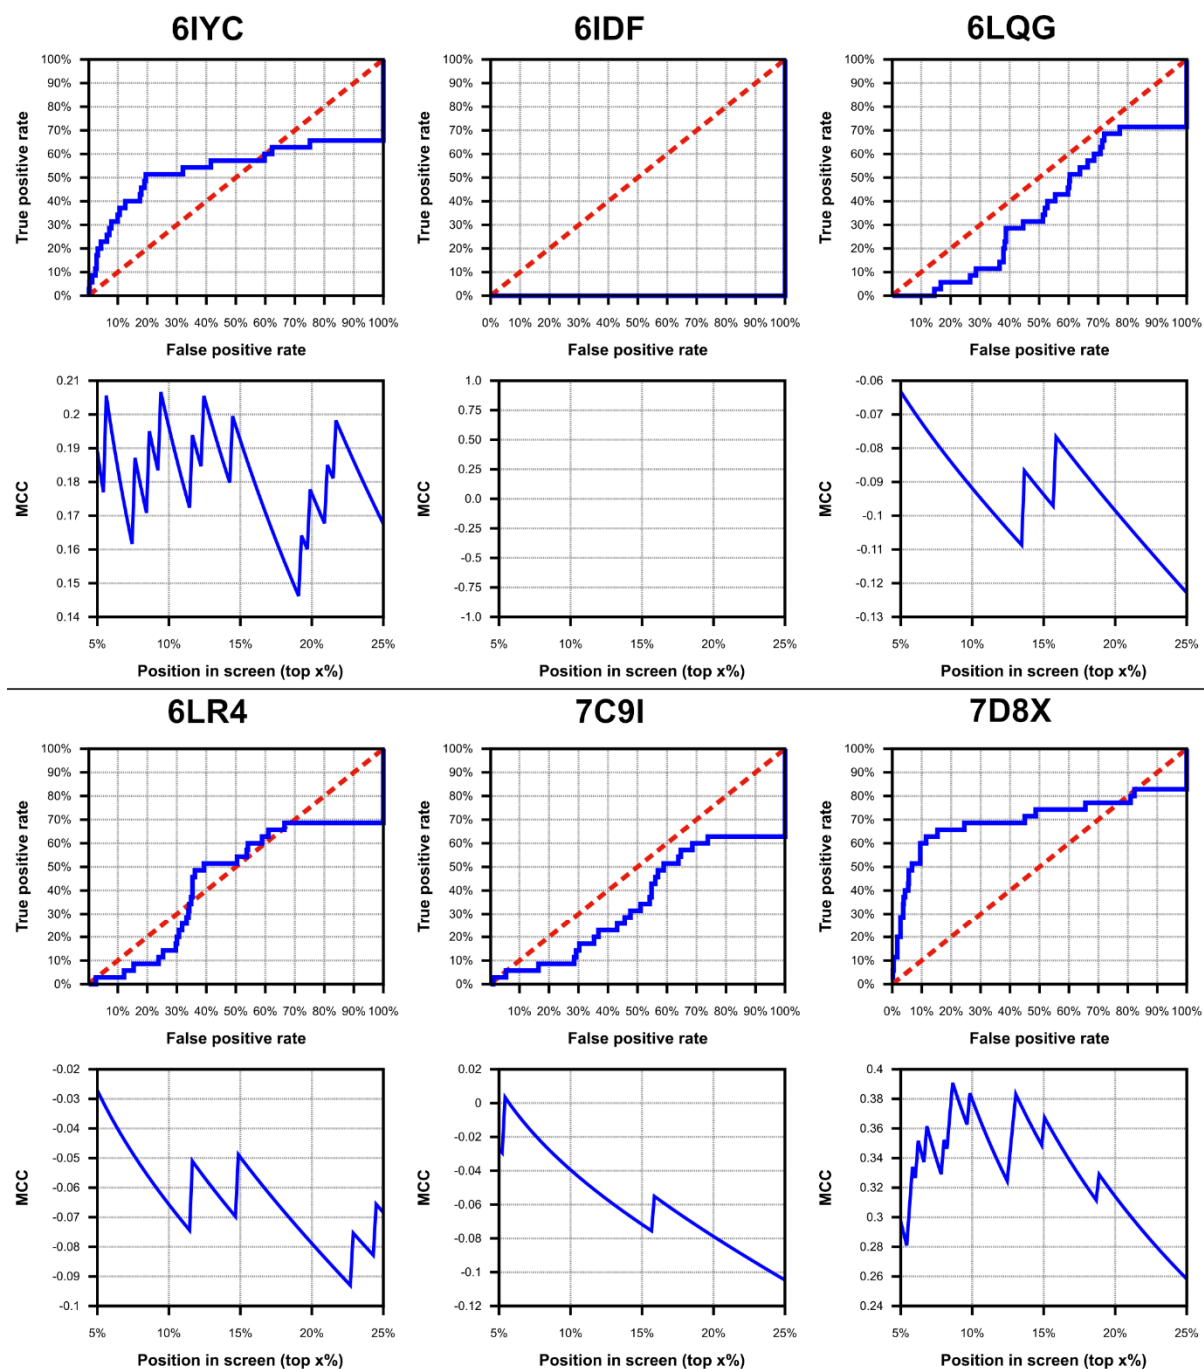

**Figure S8.** Receiver operating characteristic plots (first row; random performance indicated by red dashed line) and Matthew's correlation coefficients over the top 5–25% of screens (second row) for Glide SP (refine only) screening of top 7% of molecules obtained following ePharmacophore-based screening of library containing  $\gamma$ -secretase modulators and decoys from DUD-E.

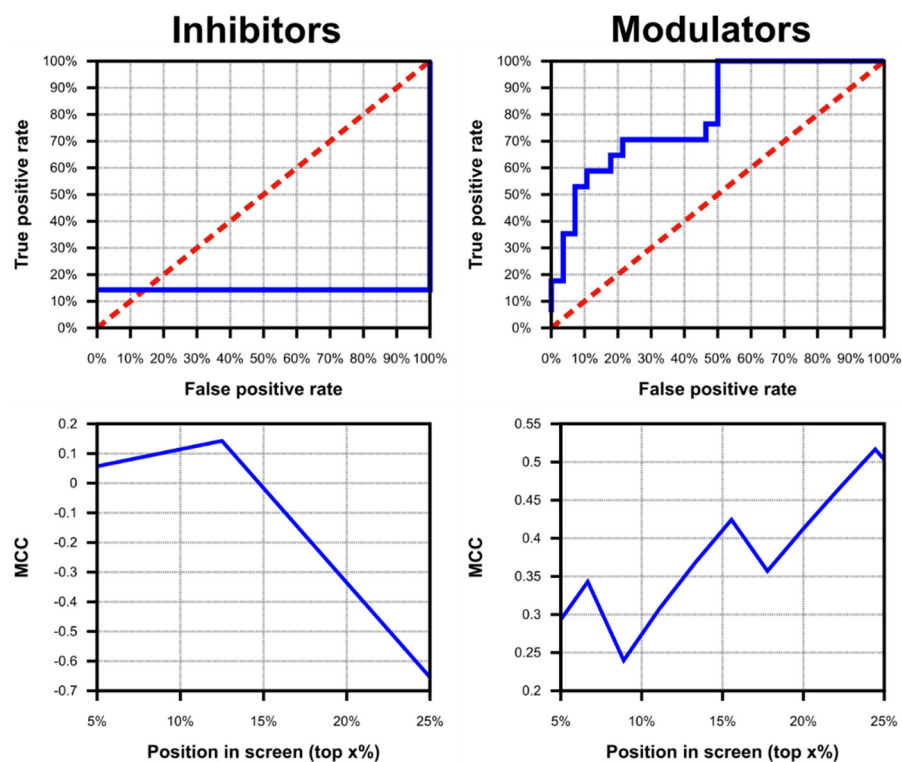

**Figure S9.** Receiver operating characteristic plots (first row; random performance indicated by red dashed line) and Matthew's correlation coefficients over the top 5-25% of screens (second row) for Prime MMGBSA rescreeing of Glide SP-based selections derived from the optimally performing structures.

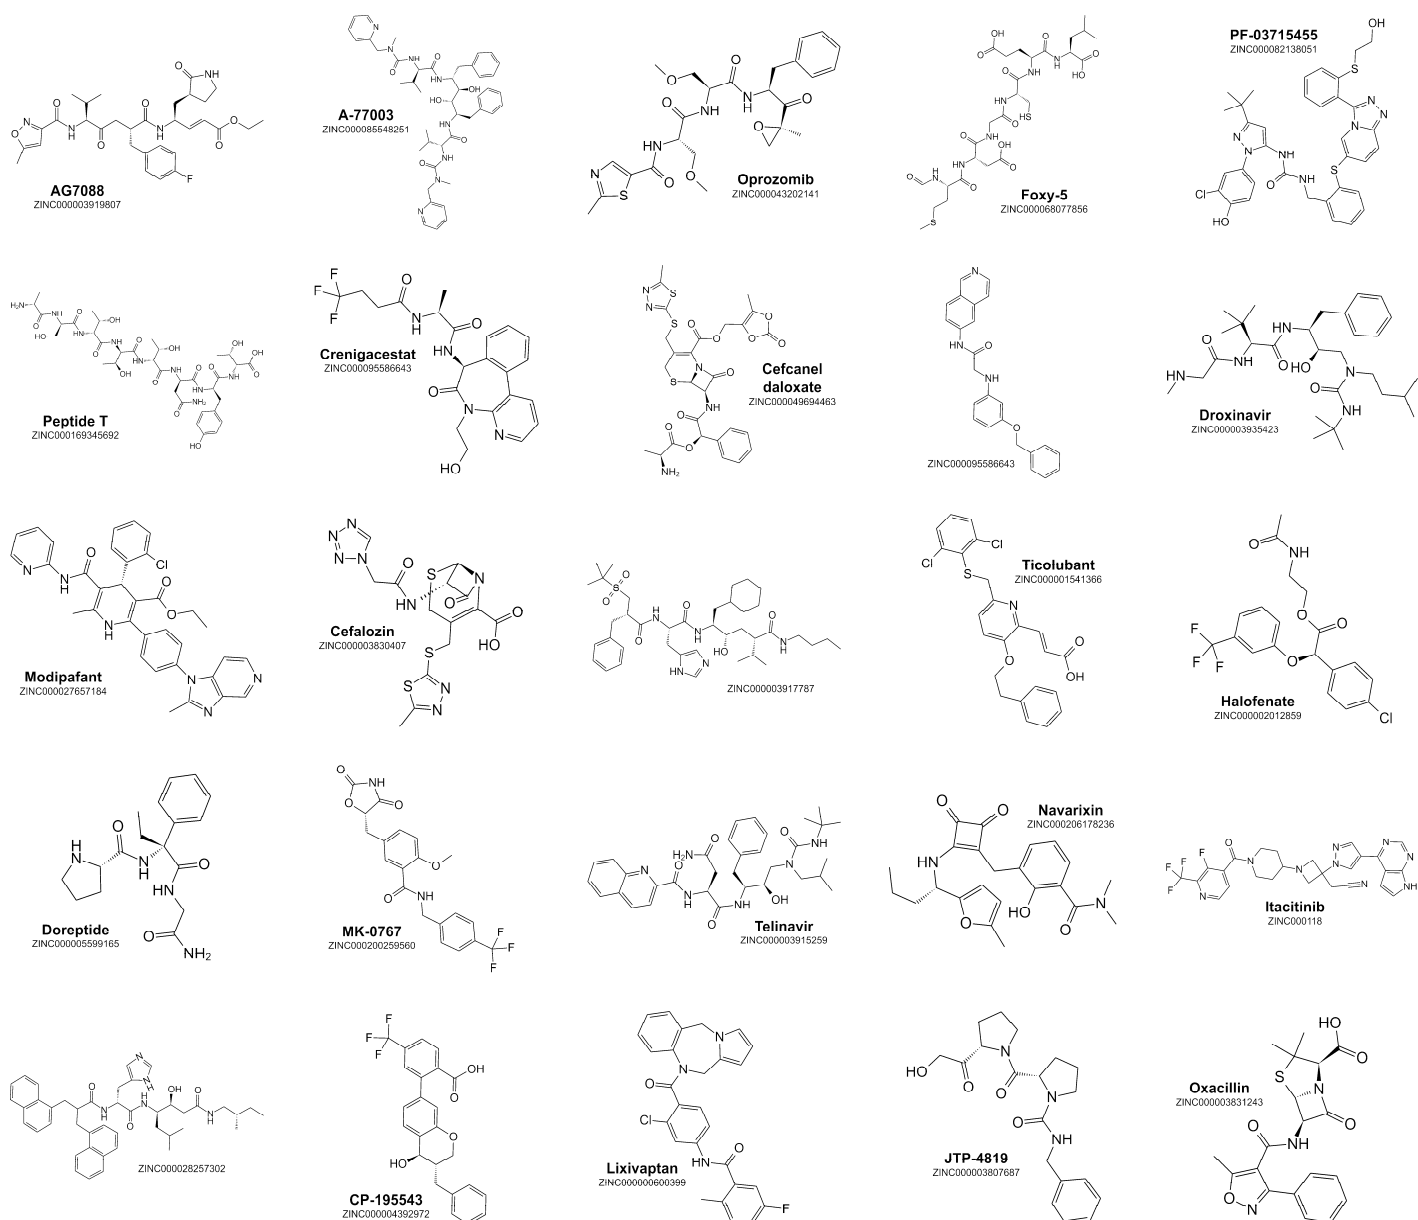

**Figure S10.** 2D structures of the molecules identified following application of the  $\gamma$ -secretase inhibitor screening protocol to the ZINC15 Investigational Set.

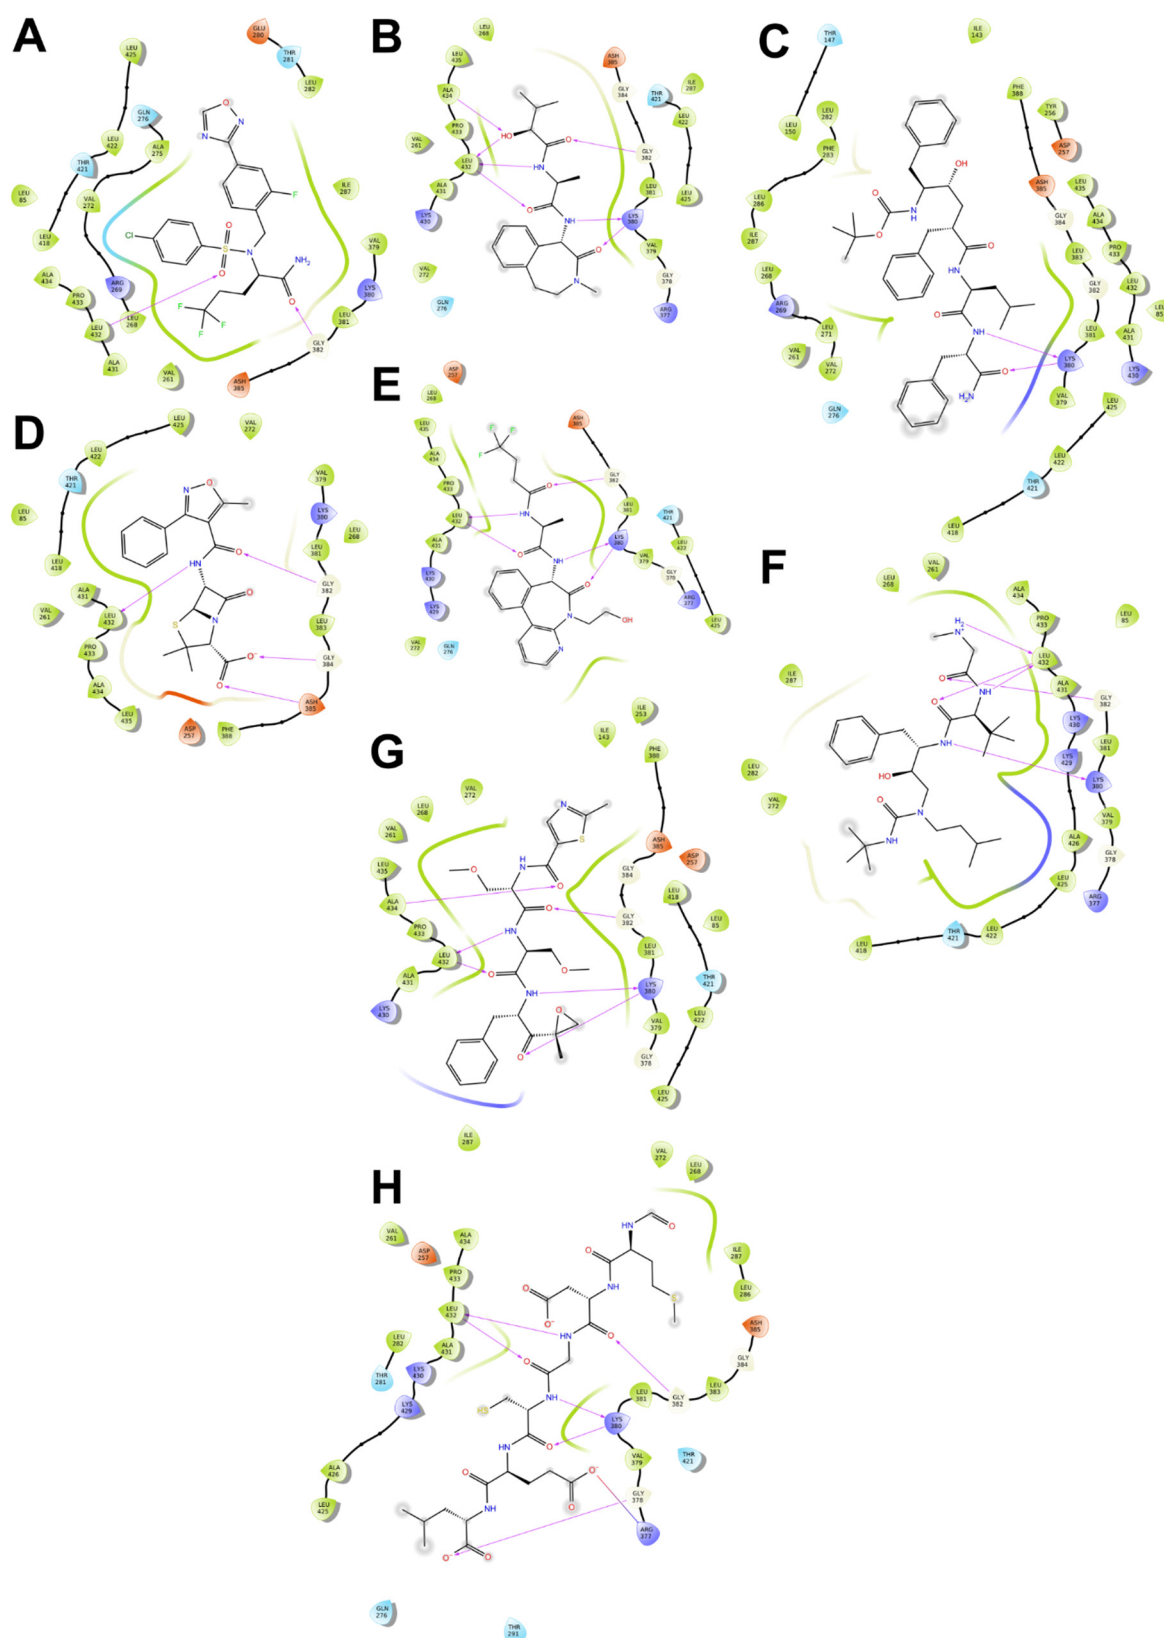

**Figure S11.** Ligand interaction diagrams for known  $\gamma$ -secretase inhibitors (A–C) and molecules selected from the ZINC15 Investigational set with at least limited shape similarity ( $>0.200$ ) to these (D–H). A. Avagacestat, B. Semagacestat. C. L685,458. D. Oxacillin. E. Crenigacestat (known  $\gamma$ -secretase inhibitor). F. Droxinavir. G. Oprozomib. H. Foxy-5. Protein residues within 4.0 Å of the ligand are shown. Legend: pink arrows—hydrogen bonds; grey halos—solvent accessibility of ligand atoms; thick coloured lines—protein surface near ligand.



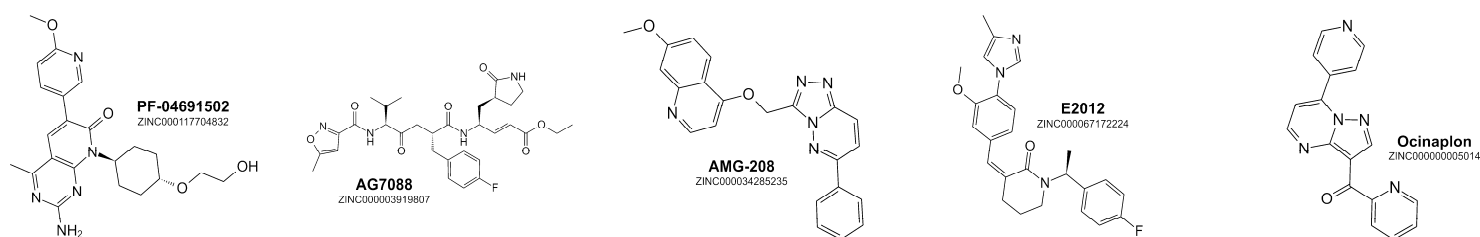

**Figure S12.** 2D structures of the molecules identified following application of the  $\gamma$ -secretase modulator screening protocol to the ZINC15 Investigational Set.

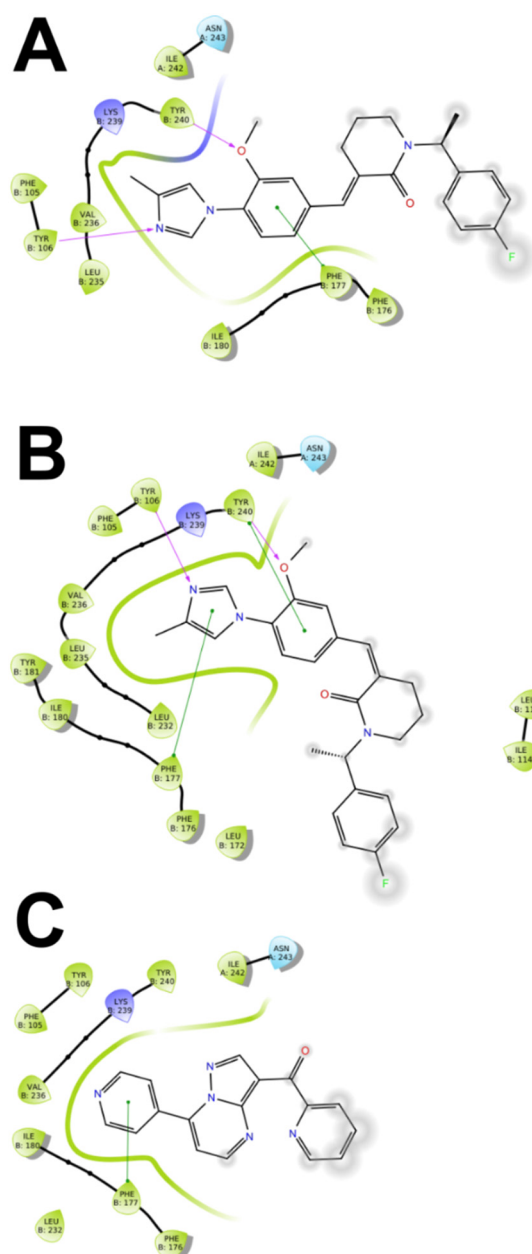

**Figure S13.** Ligand interaction diagrams for E2012 as posed against the 7D8X ePharmacophore in the validation of approaches for reproducing bound ligand structure to  $\gamma$ -secretase (A), E2012 as posed following application of the  $\gamma$ -secretase modulator screening protocol (B), and ocinaclone (C). Protein residues within 4.0 Å of the ligand are shown. Chain A denotes nicastrin and chain B denotes presenilin. Legend: pink arrows—hydrogen bonds; green lines— $\pi$ - $\pi$  interactions; grey halos—solvent accessibility of ligand atoms; thick coloured lines—protein surface near ligand.

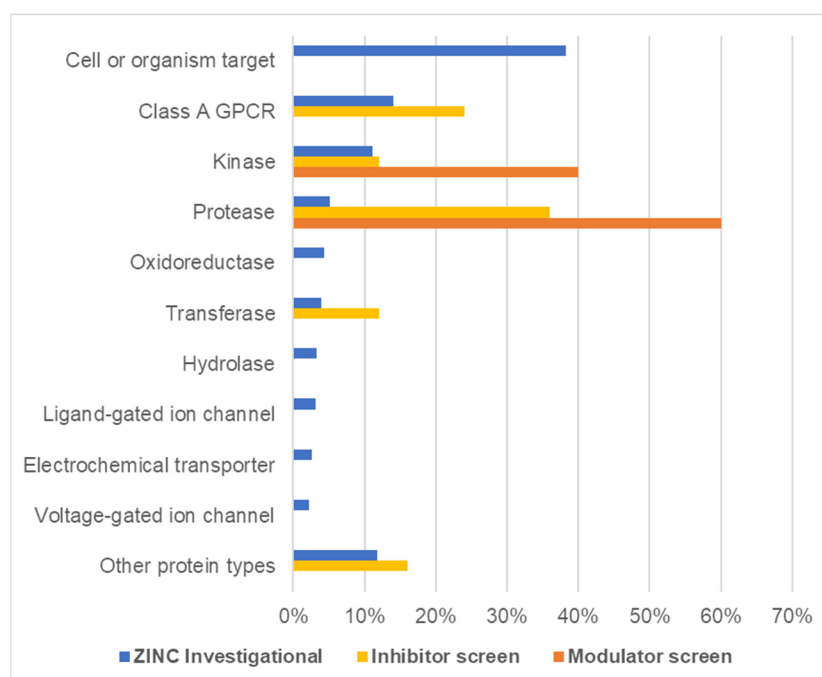

**Figure S14.** Distributions of targets reported for molecules in the ZINC Investigational set (blue bars), the molecules remaining from the ZINC Investigational set following application of the inhibitor screening strategy (yellow bars), and the molecules remaining from the ZINC Investigational set following application of the modulator screening strategy (red bars).

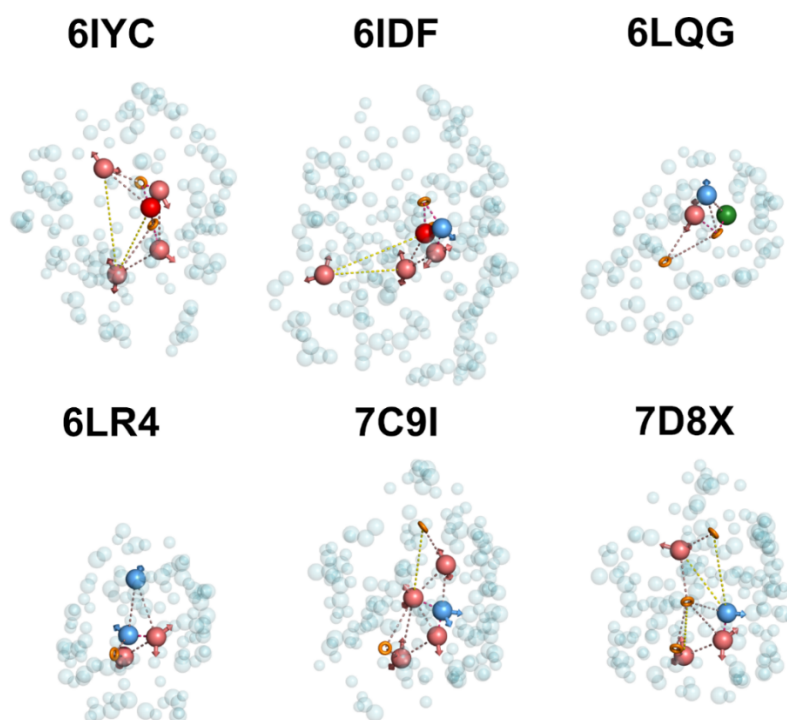

**Figure S15.** ePharmacophores generated at inhibitor-binding site of each  $\gamma$ -secretase structure. Legend: pink spheres—hydrogen bond acceptor site; red spheres—negatively charged site; blue spheres—hydrogen bond donor site; green spheres—hydrophobic site; orange rings—aromatic site; blue transparent spheres—excluded volumes; yellow dashes—site-to-site distance greater than 8.0 Å; violet dashes—site-to-site distance between 4.0 and 8.0 Å; pink dashes—site-to-site distance less than 4.0 Å.

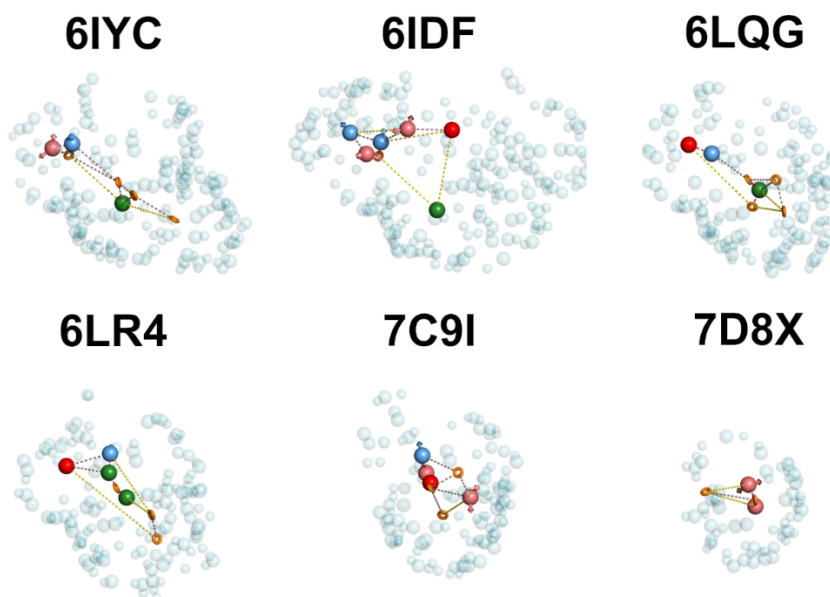

**Figure S16.** ePharmacophores generated at modulator-binding site of each  $\gamma$ -secretase structure. Legend: pink spheres—hydrogen bond acceptor site; red spheres—negatively charged site; blue spheres—hydrogen bond donor site; green spheres—hydrophobic site; orange rings—aromatic site; blue transparent spheres—excluded volumes; yellow dashes—site-to-site distance greater than 8.0 Å; violet dashes—site-to-site distance between 4.0 and 8.0 Å; pink dashes—site-to-site distance less than 4.0 Å.
